# Supplementary material
Source: PubMed Central journal article supplement (PMC2921682)
Supplement: NIHMS202177-supplement-Kohno_Suppl_Figs_1_2_3.pdf [file NIHMS202177-supplement-Kohno_Suppl_Figs_1_2_3.pdf]

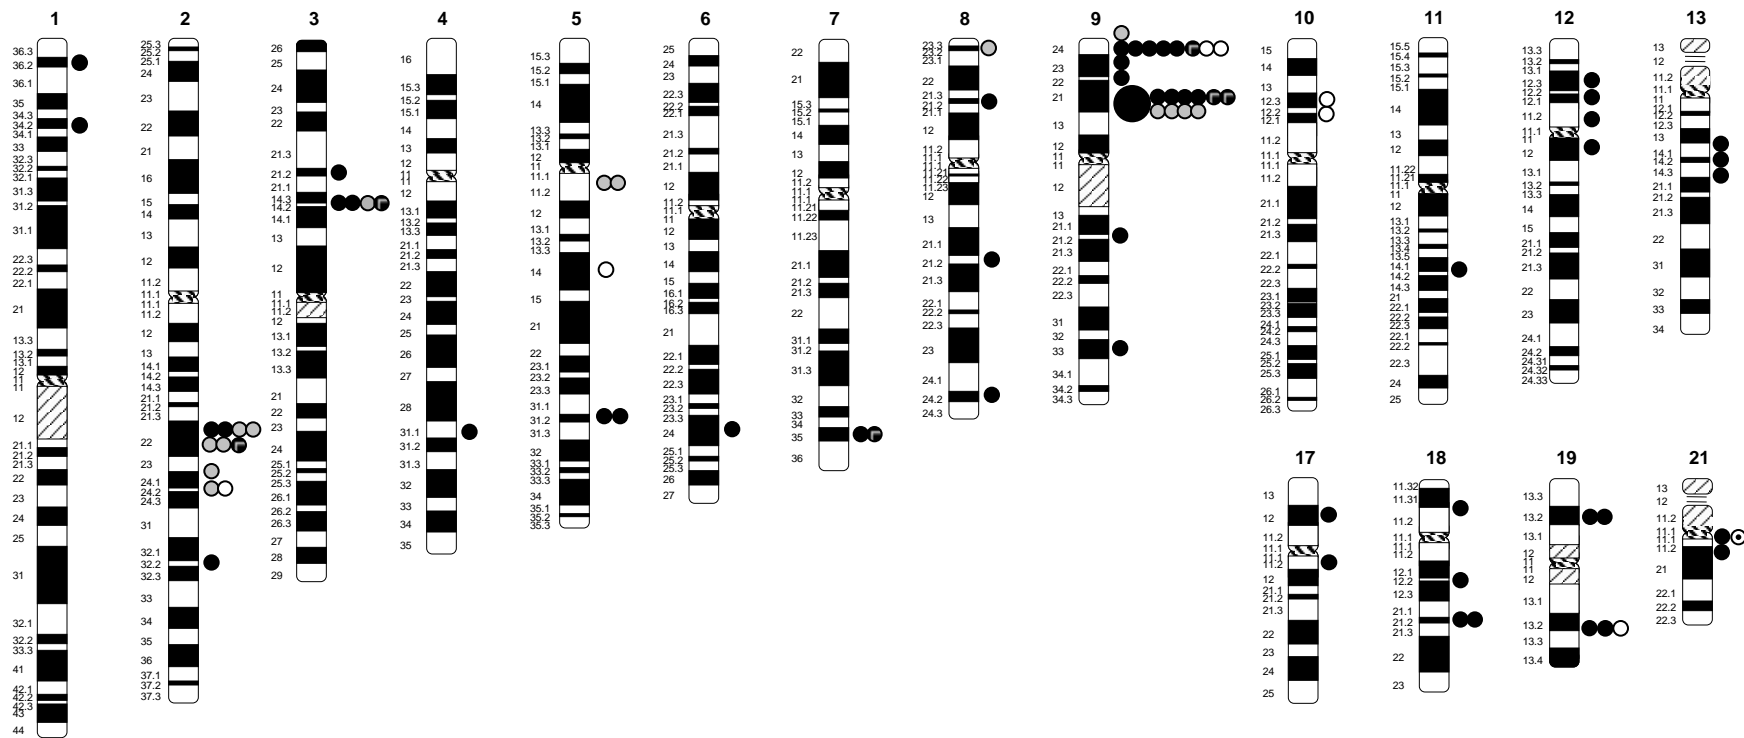

**Histology:** ● ADC ◐ SQC ● LCC ◊ ASC ○ SCC

**No. of deletions:** ● 1 ● 10

**Supplementary Fig. 1. Chromosomal distribution of 45 regions of homozygous deletions.**

Homozygous deletions in each histological type of lung cancer are indicated by dots.

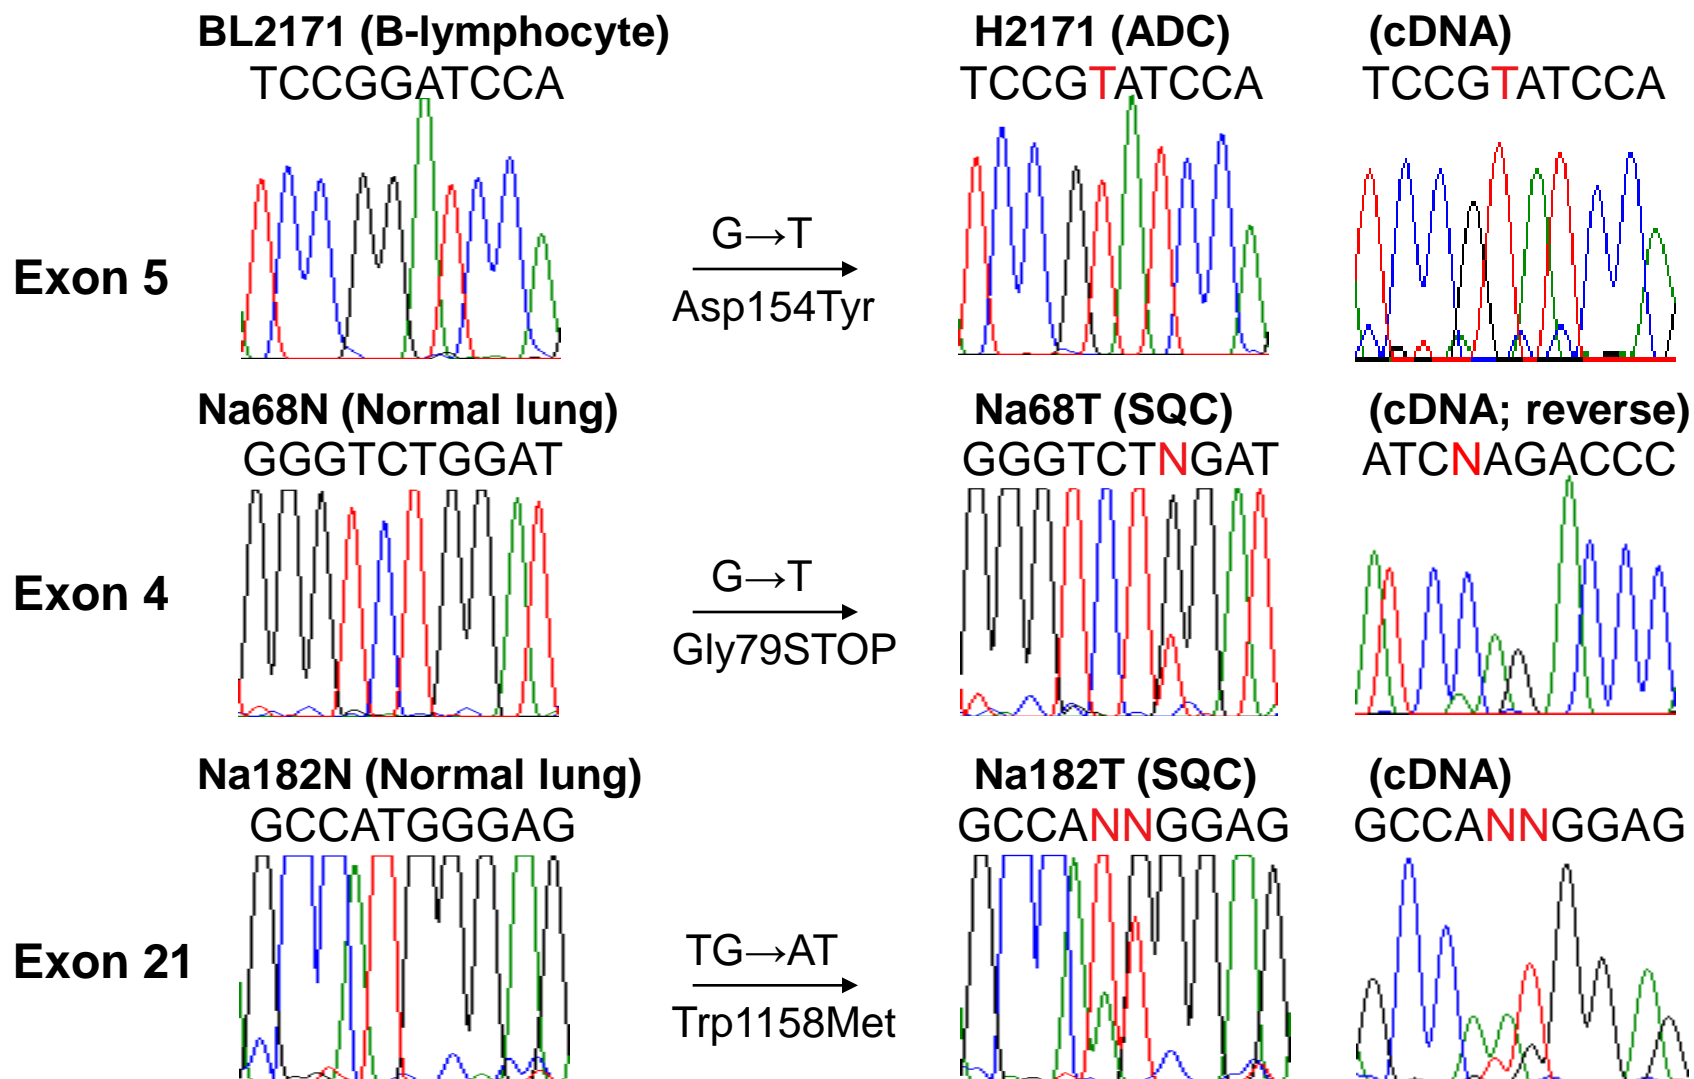

**Supplementary Fig. 2A Mutations of the *PTPRD* gene in human lung cancer.**

Electrophoregrams for DNA of non-cancerous (left) and cancerous (middle) lung cells and cDNAs (right) from cancerous lung cells of three cases are shown.

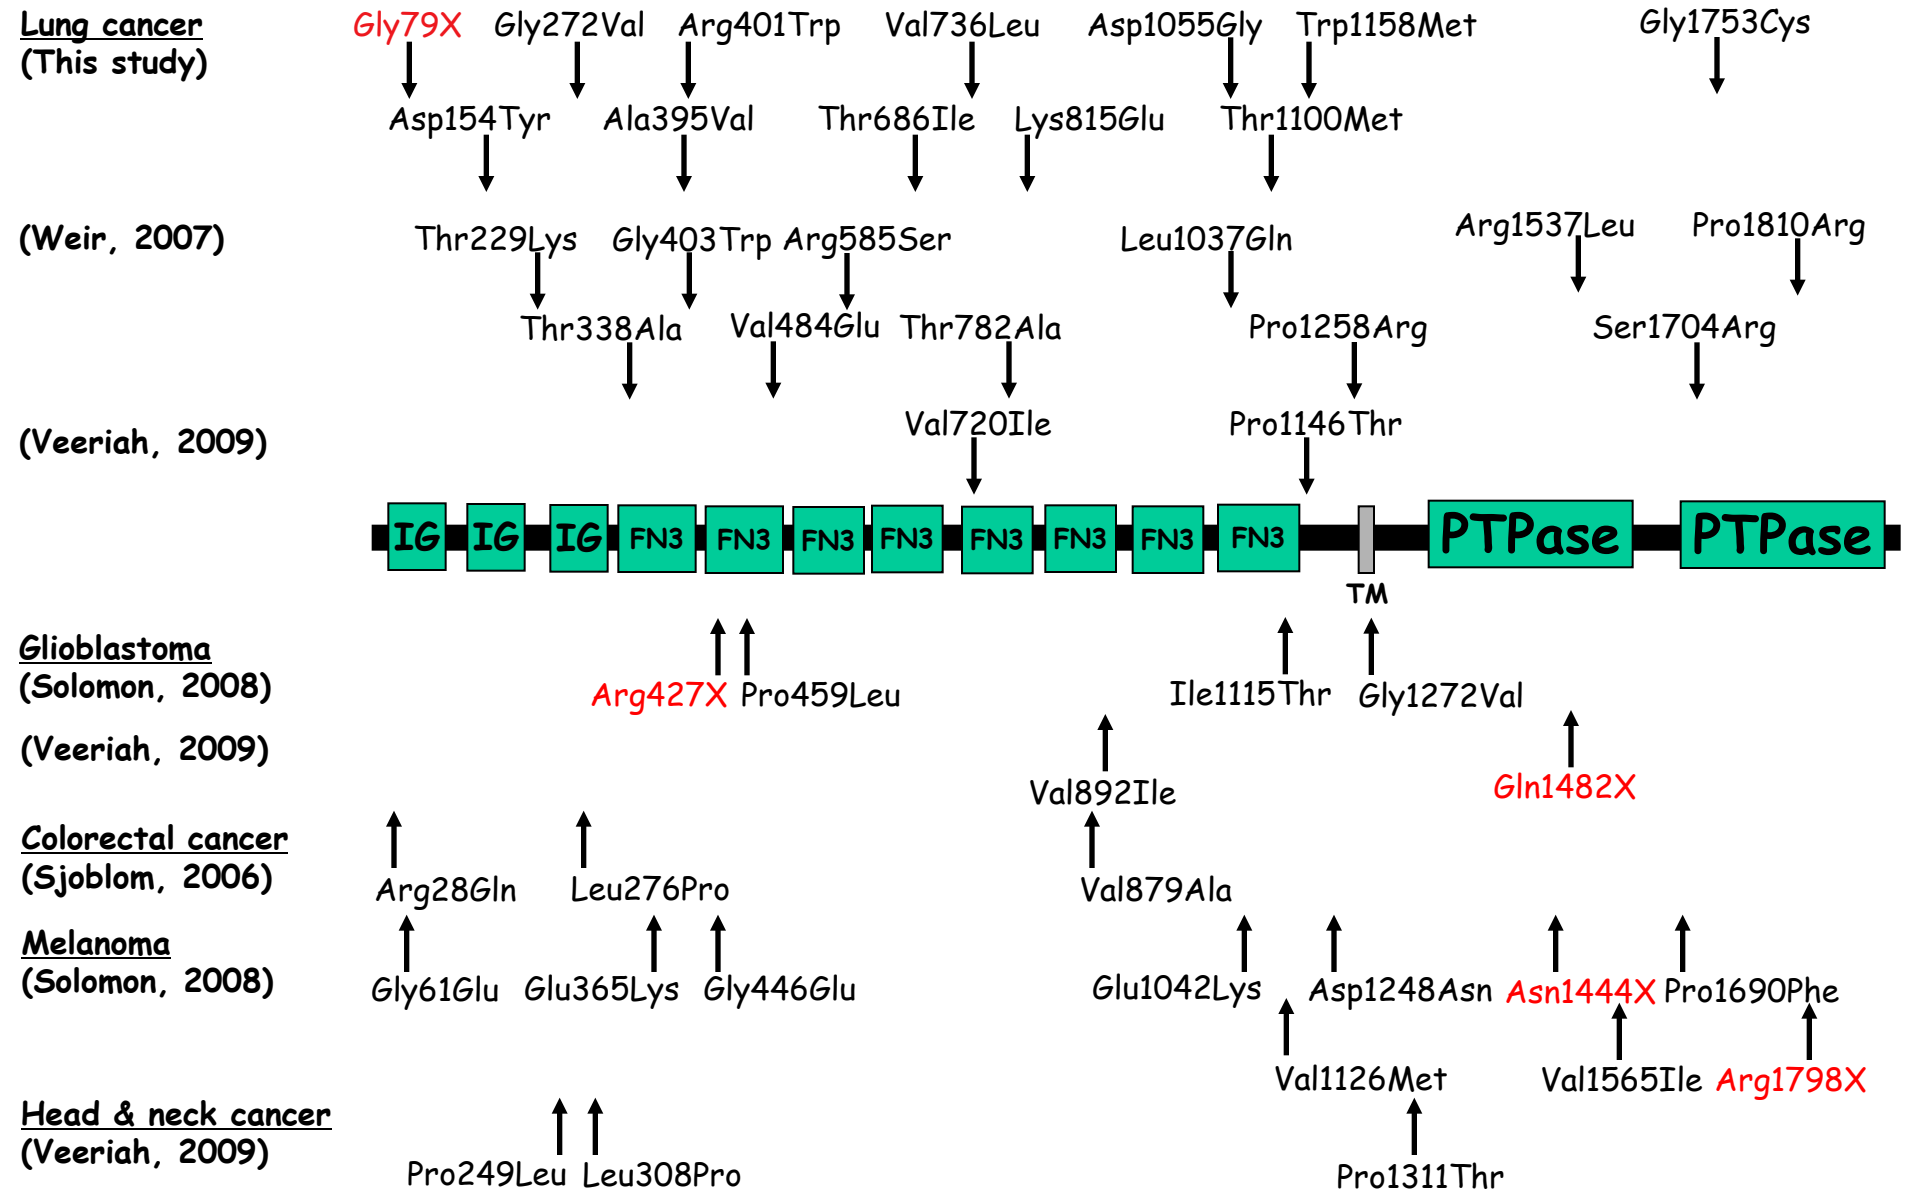

Supplementary Fig. 2B Missense and nonsense mutations in the *PTPRD* gene in human cancers.

IG: immunoglobulin domain, FN3: fibronectin-like 3 domain, TM: transmembrane domain, PTPase: phosphatase domain. Nonsense mutations are in RED.

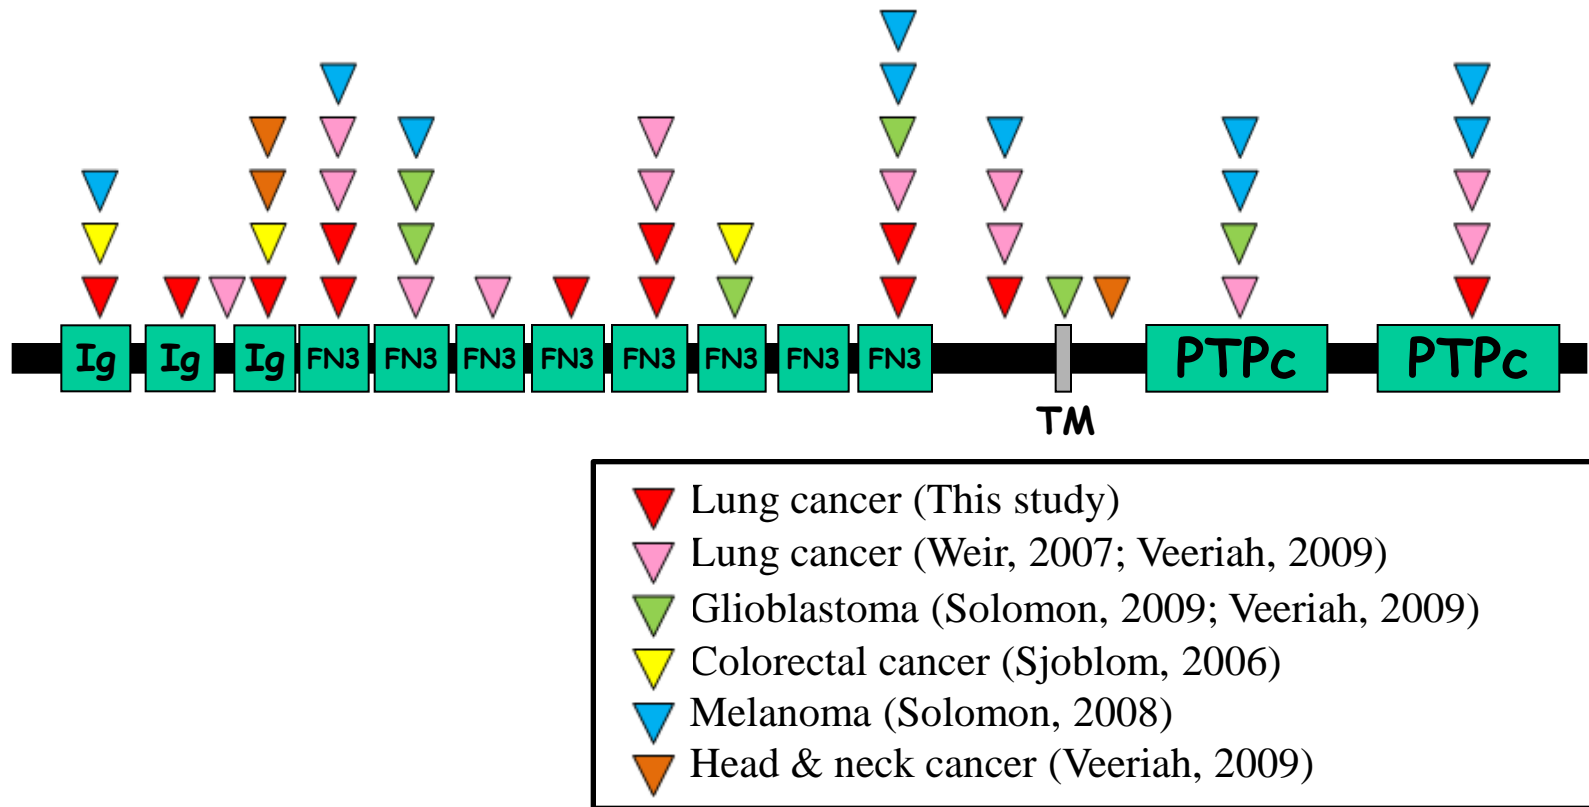

**Supplementary Fig. 2C Missense and nonsense mutations in the *PTPRD* gene in human cancers according to domains.**  
 Ig: immunoglobulin-like C2-type domain, FN3: fibronectin type III domain, TM: transmembrane domain, PTPc: protein tyrosine phosphatase catalytic domain.

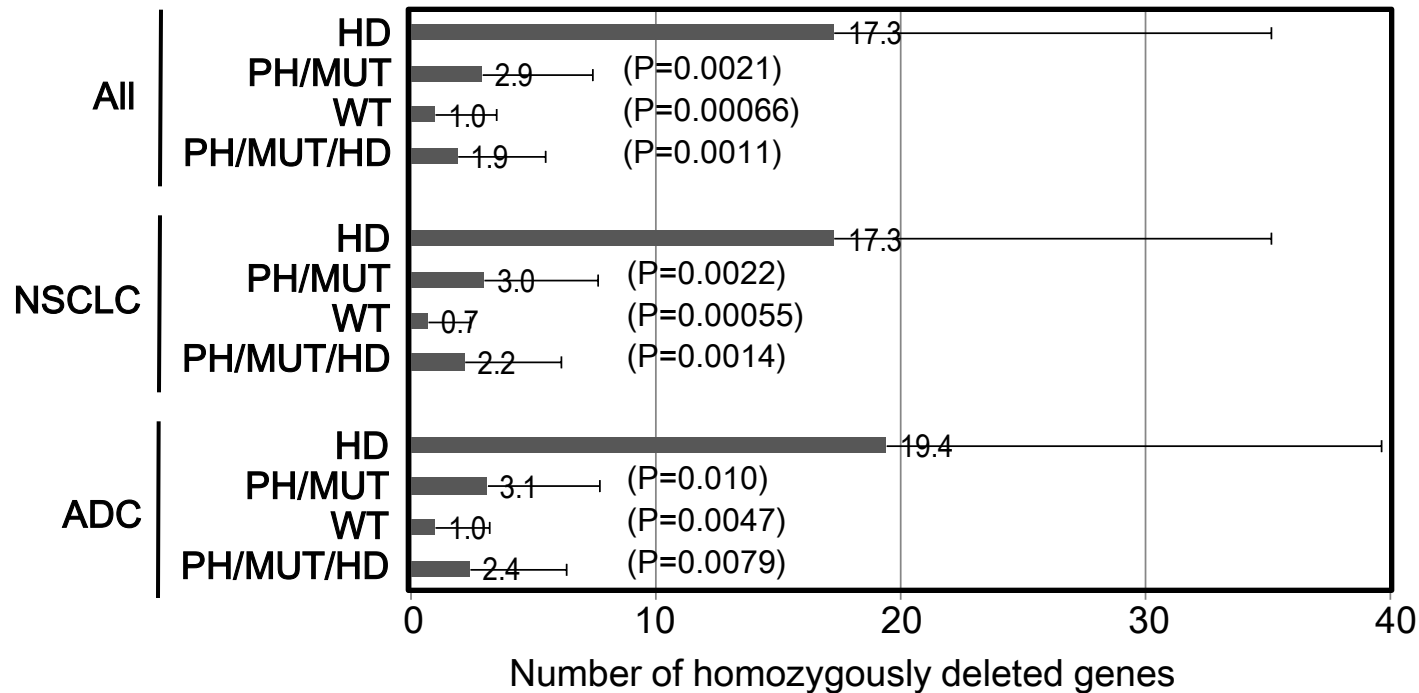

**Supplementary Fig. 3** Number of homozygously deleted genes in lung cancer cell lines according to *CDKN2A/p16* alterations. HD: homozygous deletion, PH: promoter hypermethylation, MUT: mutation, WT: wild type. P values by *t*-test against cases with homozygous *CDKN2A/p16* deletions are shown.
