# Supplementary material
Source: PubMed Central journal article supplement (PMC2921682)
Supplement: NIHMS202177-supplement-Kohno_Suppl_Table_2.pdf [file NIHMS202177-supplement-Kohno_Suppl_Table_2.pdf]

Supplementary Table 2. PCR primers used for examination of homozygou deletion

| Chromosomal location | Gene                                                                                                                                                                                                                                                                                                                                                                                                                                                                                                                                                                                                                                                                                                                                                                                                                                                                                                                                                                                                                                                                                                                                                                       | Exon                        | Primer sequence (Forward) | Primer sequence (Reverse)  | Product size           | Lcoion of genomic fragments amplified |
|----------------------|----------------------------------------------------------------------------------------------------------------------------------------------------------------------------------------------------------------------------------------------------------------------------------------------------------------------------------------------------------------------------------------------------------------------------------------------------------------------------------------------------------------------------------------------------------------------------------------------------------------------------------------------------------------------------------------------------------------------------------------------------------------------------------------------------------------------------------------------------------------------------------------------------------------------------------------------------------------------------------------------------------------------------------------------------------------------------------------------------------------------------------------------------------------------------|-----------------------------|---------------------------|----------------------------|------------------------|---------------------------------------|
| 1p36                 | PRDM2/RIZ                                                                                                                                                                                                                                                                                                                                                                                                                                                                                                                                                                                                                                                                                                                                                                                                                                                                                                                                                                                                                                                                                                                                                                  | ex2                         | CTGAAGACAAGTGAGCCAGA      | TAGCATATAGAAGGCTCAGC       | 224bp                  | 13972216 13972439                     |
| 1p34                 | TFE1                                                                                                                                                                                                                                                                                                                                                                                                                                                                                                                                                                                                                                                                                                                                                                                                                                                                                                                                                                                                                                                                                                                                                                       | ex9                         | ACCACAGCTGAGTTGGAGGT      | TCTAGAGCCCTACTCTGCTCA      | 170bp                  | 43547676 43547845                     |
| 2q22                 | LRP1B                                                                                                                                                                                                                                                                                                                                                                                                                                                                                                                                                                                                                                                                                                                                                                                                                                                                                                                                                                                                                                                                                                                                                                      | ex1                         | GCGTGTAGTGAAGATCAGACG     | TCAATGAGTCCAGGCCAGTCA      | 163bp                  | 142604908 142605070                   |
|                      |                                                                                                                                                                                                                                                                                                                                                                                                                                                                                                                                                                                                                                                                                                                                                                                                                                                                                                                                                                                                                                                                                                                                                                            | ex4                         | GCCAACAGCTGAAATTGTTCAG    | GCACATGTTAGGTGCTCAAAA      | 196bp                  | 141728470 141728665                   |
|                      |                                                                                                                                                                                                                                                                                                                                                                                                                                                                                                                                                                                                                                                                                                                                                                                                                                                                                                                                                                                                                                                                                                                                                                            | ex8                         | GCACTGGCACTAGACCTAGT      | ATGACTCATTTGCAGCTCGAC      | 226bp                  | 141535981 141536206                   |
|                      |                                                                                                                                                                                                                                                                                                                                                                                                                                                                                                                                                                                                                                                                                                                                                                                                                                                                                                                                                                                                                                                                                                                                                                            |                             |                           |                            |                        |                                       |
| 2q24                 | GALNT13                                                                                                                                                                                                                                                                                                                                                                                                                                                                                                                                                                                                                                                                                                                                                                                                                                                                                                                                                                                                                                                                                                                                                                    | ex9                         | GCTTCAGTTGCTTTCATCTCA     | TGATGACATGACCAGTGGCCA      | 173bp                  | 154866104 154866276                   |
| 2q24                 | KCNH7<br>FIGN<br>GRB14<br>COBLL1<br>SLC38A11<br>SCN3A<br>SCN2A<br>FAM130A2<br>GALNT3<br>TTC21B<br>SCN1A                                                                                                                                                                                                                                                                                                                                                                                                                                                                                                                                                                                                                                                                                                                                                                                                                                                                                                                                                                                                                                                                    | ex1                         | GGCATGTGGGCCACCACAAAAT    | GCCTCTTAAGTTGACAGAGC       | 176bp                  | 163403083 163403258                   |
|                      |                                                                                                                                                                                                                                                                                                                                                                                                                                                                                                                                                                                                                                                                                                                                                                                                                                                                                                                                                                                                                                                                                                                                                                            | ex2                         | GACATGGAACTTGCATTCTCTG    | TCATGAGCAACTGCTTGCCCA      | 385bp                  | 164299555 164299939                   |
|                      |                                                                                                                                                                                                                                                                                                                                                                                                                                                                                                                                                                                                                                                                                                                                                                                                                                                                                                                                                                                                                                                                                                                                                                            | ex2                         | GGTACATGTTTGCCTTTAGCA     | GGTCTGGCTGACAAACAGAT       | 197bp                  | 165184475 165184671                   |
|                      |                                                                                                                                                                                                                                                                                                                                                                                                                                                                                                                                                                                                                                                                                                                                                                                                                                                                                                                                                                                                                                                                                                                                                                            | ex2                         | ACTGATGTCTCTTCTCAGCTGC    | CCACTGAGAGTTCAACGTTCT      | 97bp                   | 165308486 165308582                   |
|                      |                                                                                                                                                                                                                                                                                                                                                                                                                                                                                                                                                                                                                                                                                                                                                                                                                                                                                                                                                                                                                                                                                                                                                                            | ex2                         | CTGTCTTATGTGCAACTTAC      | TGCACAGTTGAAGTTGCAGA       | 262bp                  | 165517418 165517679                   |
|                      |                                                                                                                                                                                                                                                                                                                                                                                                                                                                                                                                                                                                                                                                                                                                                                                                                                                                                                                                                                                                                                                                                                                                                                            | ex2                         | CGATCTTCTGATGCTCTCTGCT    | TCCTGTATACAGCTGTCCCTTG     | 212bp                  | 165751220 165751431                   |
|                      |                                                                                                                                                                                                                                                                                                                                                                                                                                                                                                                                                                                                                                                                                                                                                                                                                                                                                                                                                                                                                                                                                                                                                                            | ex2                         | GCAATCTCTCGATTCAAGTGC     | TGTGATCTCAATAAATTGGTC      | 154bp                  | 165861800 165861953                   |
|                      |                                                                                                                                                                                                                                                                                                                                                                                                                                                                                                                                                                                                                                                                                                                                                                                                                                                                                                                                                                                                                                                                                                                                                                            | ex2                         | GCTATAGCTCAGCTCATGTGA     | TGGATGGATTGACACTGTCC       | 265bp                  | 166159687 166159951                   |
|                      |                                                                                                                                                                                                                                                                                                                                                                                                                                                                                                                                                                                                                                                                                                                                                                                                                                                                                                                                                                                                                                                                                                                                                                            | ex2                         | ATTGAGCCATGCCTGTAGGA      | TAGGTGAGCCATTCTGACAT       | 180bp                  | 166335445 166335624                   |
|                      |                                                                                                                                                                                                                                                                                                                                                                                                                                                                                                                                                                                                                                                                                                                                                                                                                                                                                                                                                                                                                                                                                                                                                                            | ex2                         | TTTCAGAGCACCAGAATTCTCT    | CCTGAAGACTTGGATTCACTTC     | 149bp                  | 166514382 166514530                   |
|                      |                                                                                                                                                                                                                                                                                                                                                                                                                                                                                                                                                                                                                                                                                                                                                                                                                                                                                                                                                                                                                                                                                                                                                                            | ex2                         | CATCTTCCGGTTCAGTGGCCA     | AGTGGTTTACAGATTCTGTAC      | 144bp                  | 166623272 166623415                   |
|                      |                                                                                                                                                                                                                                                                                                                                                                                                                                                                                                                                                                                                                                                                                                                                                                                                                                                                                                                                                                                                                                                                                                                                                                            | ex2                         | CCATTAACCTAGGTATCACTGA    | TATCATACAGTTTCCGATCAG      | 269bp                  | 188956537 188956805                   |
|                      |                                                                                                                                                                                                                                                                                                                                                                                                                                                                                                                                                                                                                                                                                                                                                                                                                                                                                                                                                                                                                                                                                                                                                                            | 3p21                        | PRM1                      | ex26                       | GATGCCACCAATAGACCTTTTC | TGAAACAGGATCTTAGCCACTC                |
| 3p14                 | PHIT                                                                                                                                                                                                                                                                                                                                                                                                                                                                                                                                                                                                                                                                                                                                                                                                                                                                                                                                                                                                                                                                                                                                                                       | ex5                         | CAGAATGCATCTTGGTGAAC      | CTGGTTAGGCTCAGAAGACT       | 334bp                  | 60497576 60497990                     |
| 4q31                 | MAML3                                                                                                                                                                                                                                                                                                                                                                                                                                                                                                                                                                                                                                                                                                                                                                                                                                                                                                                                                                                                                                                                                                                                                                      | ex4                         | AGCAGCATCCAGTTGGACTT      | GCTGTATCAATGAGCATCTGC      | 159bp                  | 140871112 140871270                   |
| 5q11                 | PDE4D                                                                                                                                                                                                                                                                                                                                                                                                                                                                                                                                                                                                                                                                                                                                                                                                                                                                                                                                                                                                                                                                                                                                                                      | ex LF-3                     | TTGTTGTAGGTTCTTGGCCAGT    | CACAGACCAACTGGCAACAA       | 200bp                  | 58516655 58516854                     |
| 5q14                 | CETN3<br>LOC153364<br>POLR3G<br>LYSMD3<br>GPR98<br>ARRDC3<br>C6orf21<br>FLJ25680<br>KIAA0825<br>BRCTD1<br>MCTP1                                                                                                                                                                                                                                                                                                                                                                                                                                                                                                                                                                                                                                                                                                                                                                                                                                                                                                                                                                                                                                                            | ex2                         | AGCTGATGTAATGAAGATTTC     | CCTAACAGCTGTCTGATTACA      | 120bp                  | 89737218 89737337                     |
|                      |                                                                                                                                                                                                                                                                                                                                                                                                                                                                                                                                                                                                                                                                                                                                                                                                                                                                                                                                                                                                                                                                                                                                                                            | ex2                         | GCTCACTGTTTATGCACATGC     | TTGCAAGAGATCGCATGGCA       | 317bp                  | 89792781 89793097                     |
|                      |                                                                                                                                                                                                                                                                                                                                                                                                                                                                                                                                                                                                                                                                                                                                                                                                                                                                                                                                                                                                                                                                                                                                                                            | ex2                         | GTGAGCAGTTTCAACAGTCCAG    | AGGTTAAAGCAGCAGCTCCT       | 249bp                  | 89816932 89817180                     |
|                      |                                                                                                                                                                                                                                                                                                                                                                                                                                                                                                                                                                                                                                                                                                                                                                                                                                                                                                                                                                                                                                                                                                                                                                            | ex2                         | CTGGAATGTATGATGCATGC      | CACCTTGACTGAACTCTGGA       | 145bp                  | 89856808 89856952                     |
|                      |                                                                                                                                                                                                                                                                                                                                                                                                                                                                                                                                                                                                                                                                                                                                                                                                                                                                                                                                                                                                                                                                                                                                                                            | ex2                         | GAGCCAGCAAAATTGTTACTGC    | GGAGCACTCTATAAACTCTGT      | 206bp                  | 89946563 89946768                     |
|                      |                                                                                                                                                                                                                                                                                                                                                                                                                                                                                                                                                                                                                                                                                                                                                                                                                                                                                                                                                                                                                                                                                                                                                                            | ex2                         | ACTGCTTACCTCATTTCGAAG     | ACAACTGCATAGTTTAGGTG       | 228bp                  | 90708111 90708338                     |
|                      |                                                                                                                                                                                                                                                                                                                                                                                                                                                                                                                                                                                                                                                                                                                                                                                                                                                                                                                                                                                                                                                                                                                                                                            | ex2                         | CCTGATACCTCGGAAGGATT      | CACCATGCAGGATGTCACT        | 218bp                  | 93414409 93414626                     |
|                      |                                                                                                                                                                                                                                                                                                                                                                                                                                                                                                                                                                                                                                                                                                                                                                                                                                                                                                                                                                                                                                                                                                                                                                            | ex1                         | AGCACCAAGTGTGCTTTCACC     | AATCTGAGGAGGCCAGAGT        | 123bp                  | 93102043 93102165                     |
|                      |                                                                                                                                                                                                                                                                                                                                                                                                                                                                                                                                                                                                                                                                                                                                                                                                                                                                                                                                                                                                                                                                                                                                                                            | ex2                         | GCTGCAGTCTATGGAACATTC     | TCCTGAAGAGTTTGTGACAG       | 296bp                  | 93943961 93944256                     |
|                      |                                                                                                                                                                                                                                                                                                                                                                                                                                                                                                                                                                                                                                                                                                                                                                                                                                                                                                                                                                                                                                                                                                                                                                            | ex2                         | GGTGTAAAGACTCTCATTTTG     | AAACCTGCCAGAGCTCTGTA       | 255bp                  | 94047925 94048149                     |
|                      |                                                                                                                                                                                                                                                                                                                                                                                                                                                                                                                                                                                                                                                                                                                                                                                                                                                                                                                                                                                                                                                                                                                                                                            | ex2                         | GGAAATGTACCAGCTGGACAT     | TAACTCAGGCAATCACGCTGG      | 147bp                  | 94378744 94378890                     |
|                      |                                                                                                                                                                                                                                                                                                                                                                                                                                                                                                                                                                                                                                                                                                                                                                                                                                                                                                                                                                                                                                                                                                                                                                            | ex25                        | TGATTTGATGAAGGCTGCTG      | GCCAGTAGCAATCTTCTGTGTG     | 223bp                  | 138173627 138173849                   |
|                      |                                                                                                                                                                                                                                                                                                                                                                                                                                                                                                                                                                                                                                                                                                                                                                                                                                                                                                                                                                                                                                                                                                                                                                            | ex4                         | TTCCACAGCGTTAGCATGAG      | CAAGCTCTTCTGGTGACTTG       | 309bp                  | 144842480 144842788                   |
|                      |                                                                                                                                                                                                                                                                                                                                                                                                                                                                                                                                                                                                                                                                                                                                                                                                                                                                                                                                                                                                                                                                                                                                                                            | ex4                         | CAAGCCTACCATTTGGATGA      | GAAGTGTAGTTTATTGTGACAGA    | 366bp                  | 146371827 146372192                   |
| 8p23                 | CSMD1                                                                                                                                                                                                                                                                                                                                                                                                                                                                                                                                                                                                                                                                                                                                                                                                                                                                                                                                                                                                                                                                                                                                                                      | ex4                         | TATAAGTGGCTCTTCCATGGA     | CTGACGATGCAGGTCCAGAT       | 211bp                  | 3876882 3877092                       |
|                      |                                                                                                                                                                                                                                                                                                                                                                                                                                                                                                                                                                                                                                                                                                                                                                                                                                                                                                                                                                                                                                                                                                                                                                            | ex4                         | TCGGGCTACTGGAATGACTA      | TGTTATGACCTCTGACCCATG      | 344bp                  | 28883554 28883897                     |
|                      |                                                                                                                                                                                                                                                                                                                                                                                                                                                                                                                                                                                                                                                                                                                                                                                                                                                                                                                                                                                                                                                                                                                                                                            | ex21                        | CAGTGGCTACAGTACTTCGA      | TACCACCTTGACATCAGGAC       | 180bp                  | 87533989 87534168                     |
|                      |                                                                                                                                                                                                                                                                                                                                                                                                                                                                                                                                                                                                                                                                                                                                                                                                                                                                                                                                                                                                                                                                                                                                                                            | ex5                         | TTACAGGCGTTCAGCCACTGCG    | ACATCACTTAAGGTCAGATTGC     | 241bp                  | 87566281 87566521                     |
| 8q24                 | TG<br>SLA<br>C9orf66<br>DOCK8<br>KANK1<br>DMRT1<br>DMRT3<br>DMRT2                                                                                                                                                                                                                                                                                                                                                                                                                                                                                                                                                                                                                                                                                                                                                                                                                                                                                                                                                                                                                                                                                                          | ex43                        | CTGAGAGCAATCATCTCTGGA     | ATGAGCAGATCTGCACTCTGC      | 334bp                  | 134177417 134177750                   |
|                      |                                                                                                                                                                                                                                                                                                                                                                                                                                                                                                                                                                                                                                                                                                                                                                                                                                                                                                                                                                                                                                                                                                                                                                            | ex1                         | GACTGGATATTTCTCTGCTCG     | TCCAAAGCAAGGCACTCTCCA      | 218bp                  | 134184210 134184427                   |
|                      |                                                                                                                                                                                                                                                                                                                                                                                                                                                                                                                                                                                                                                                                                                                                                                                                                                                                                                                                                                                                                                                                                                                                                                            | ex1                         | CTCAGACTTGGCTCAAAGGA      | AGAATCTCGGTGCTCCTGGA       | 186bp                  | 205242 205427                         |
|                      |                                                                                                                                                                                                                                                                                                                                                                                                                                                                                                                                                                                                                                                                                                                                                                                                                                                                                                                                                                                                                                                                                                                                                                            | ex3                         | CCAGAAAATCGGGTGAAGAAC     | GTTTCAGATTGAAGGCATCTC      | 311bp                  | 276413 276723                         |
| 9p24                 | KANK1<br>DMRT1<br>DMRT3<br>DMRT2                                                                                                                                                                                                                                                                                                                                                                                                                                                                                                                                                                                                                                                                                                                                                                                                                                                                                                                                                                                                                                                                                                                                           | ex6                         | TTTCTTCTTGTGACCAATCG      | AGCTGGCCCTTGACAATGAAC      | 203bp                  | 724705 724907                         |
|                      |                                                                                                                                                                                                                                                                                                                                                                                                                                                                                                                                                                                                                                                                                                                                                                                                                                                                                                                                                                                                                                                                                                                                                                            | ex2                         | TTTGAGCACCTACTGTCTGG      | GTCATGAGGCAACGGGTAACT      | 329bp                  | 836756 837084                         |
|                      |                                                                                                                                                                                                                                                                                                                                                                                                                                                                                                                                                                                                                                                                                                                                                                                                                                                                                                                                                                                                                                                                                                                                                                            | ex2                         | TCCAGGAAGCCACTCTGATT      | CCGTCTCCAAGTCGTTCTTC       | 247bp                  | 979822 980068                         |
|                      |                                                                                                                                                                                                                                                                                                                                                                                                                                                                                                                                                                                                                                                                                                                                                                                                                                                                                                                                                                                                                                                                                                                                                                            | ex2                         | GCCATAGGCTCGCGTATATC      | TCTGACTTGCCTCTGGTACA       | 347bp                  | 104344 1043790                        |
|                      |                                                                                                                                                                                                                                                                                                                                                                                                                                                                                                                                                                                                                                                                                                                                                                                                                                                                                                                                                                                                                                                                                                                                                                            | ex B1                       | GGGCGCTGTGTGGAATAGAAA     | ATTGGGCATTGAAAAGCATC       | 171bp                  | 10602327 10602497                     |
|                      |                                                                                                                                                                                                                                                                                                                                                                                                                                                                                                                                                                                                                                                                                                                                                                                                                                                                                                                                                                                                                                                                                                                                                                            | ex R7                       | GGTCTTCAGGGTGTGTGAACCT    | GGACATGATCTAAAAGCGGTA      | 115bp                  | 9564668 9564782                       |
| 9p23                 | TYRP1<br>C9orf150                                                                                                                                                                                                                                                                                                                                                                                                                                                                                                                                                                                                                                                                                                                                                                                                                                                                                                                                                                                                                                                                                                                                                          | ex2                         | CCCTCAGACACCGGTTGATAT     | GTCTATCCGTGCAGATATCAC      | 226bp                  | 12688309 12688534                     |
|                      |                                                                                                                                                                                                                                                                                                                                                                                                                                                                                                                                                                                                                                                                                                                                                                                                                                                                                                                                                                                                                                                                                                                                                                            | ex1                         | TAGTACCAGATGGGCAGTCA      | GACTCCTCCGACACTAAGAT       | 2334bp                 | 12765263 12765496                     |
|                      |                                                                                                                                                                                                                                                                                                                                                                                                                                                                                                                                                                                                                                                                                                                                                                                                                                                                                                                                                                                                                                                                                                                                                                            | ex2                         | ATGCACTTTGCCACTGAACTG     | CAGCATGTAGGATGTGTCCA       | 118bp                  | 14710126 14710243                     |
|                      |                                                                                                                                                                                                                                                                                                                                                                                                                                                                                                                                                                                                                                                                                                                                                                                                                                                                                                                                                                                                                                                                                                                                                                            | ex2                         | TTGTCCAGGATGATCAGCGGA     | CTTCAGGTCACTCTCTGACA       | 370bp                  | 14858832 14859201                     |
| 9p22                 | CER1<br>FREM1<br>BNC2                                                                                                                                                                                                                                                                                                                                                                                                                                                                                                                                                                                                                                                                                                                                                                                                                                                                                                                                                                                                                                                                                                                                                      | ex2                         | CCGCTTAAGAGGAGACCAAGA     | TCATTTCTGAGGAAGTCTAG       | 110bp                  | 16860591 16860700                     |
|                      |                                                                                                                                                                                                                                                                                                                                                                                                                                                                                                                                                                                                                                                                                                                                                                                                                                                                                                                                                                                                                                                                                                                                                                            | ex2                         | GATCTCACACAAGTGGTCAG      | GGCATACCTGTACTTTGGTGA      | 221bp                  | 17133340 17133560                     |
| 9p22                 | SH3GL2<br>ADAMTSL1                                                                                                                                                                                                                                                                                                                                                                                                                                                                                                                                                                                                                                                                                                                                                                                                                                                                                                                                                                                                                                                                                                                                                         | ex2                         | CCAAGCTAGATGATGACTTC      | GTAATTCAGAGACCAGTGG        | 147bp                  | 17737098 17737244                     |
|                      |                                                                                                                                                                                                                                                                                                                                                                                                                                                                                                                                                                                                                                                                                                                                                                                                                                                                                                                                                                                                                                                                                                                                                                            | ex2                         | ATCCGAGAATCTGATTGGCGC     | TGCGTGAGCAATCACTCCAT       | 217bp                  | 18494689 18494905                     |
|                      |                                                                                                                                                                                                                                                                                                                                                                                                                                                                                                                                                                                                                                                                                                                                                                                                                                                                                                                                                                                                                                                                                                                                                                            | ex2                         | CTTAACCTATCCAGGAGCA       | AGGTACAGACAAAAGCCACTG      | 201bp                  | 19612231 19612431                     |
|                      |                                                                                                                                                                                                                                                                                                                                                                                                                                                                                                                                                                                                                                                                                                                                                                                                                                                                                                                                                                                                                                                                                                                                                                            | ex1                         | AATGTCCAGGCGCAACGTTCA     | TATGTTACTGTGCTCCGGAC       | 197bp                  | 20610714 20610910                     |
| 9p21                 | hsa-mir-491<br>KIAA1797<br>PTPLAD2<br>IFNB1<br>IFNW1<br>IFNA21<br>IFNA4<br>IFNA14<br>IFNA7<br>IFNA10<br>IFNA16<br>IFNA17<br>KLHL9<br>IFNA6<br>IFNA13<br>IFNA2<br>IFNA8<br>IFNA1<br>IFNE1<br>hsa-mir-31<br>MTAP<br>CDKN2A/p16<br>CDKN2A/p14ARF<br>CDKN2B/p15<br>DMRTA1<br>ELAVL2<br>TUSC1<br>C9orf82<br>PLAA<br>IFT74<br>LRRC19<br>TEK<br>C9orf11<br>MOBK12B<br>IFNK<br>C9orf72<br>LINGO2<br>PSAT1<br>TLE4<br>DBC1<br>PARD3<br>C10orf67<br>GPR158<br>DRLG<br>EPSS<br>STRAP<br>DERA<br>MGST1<br>LMO3<br>RERGL<br>PIK3C2G<br>PLCZ1<br>CAPZA3<br>PLEKHA5<br>AFBP2<br>SOX5<br>BCAT1<br>MLSTD1<br>ERIGC2<br>OVCH1<br>TMTC1<br>ADAMTS20<br>PUS7L<br>IRAK4<br>TWF1<br>TMEM117<br>NELL2<br>DBX2<br>PLEKHA9<br>TMEM16F<br>RB1<br>RCBTB2<br>CYS1L/TR2<br>FNDCA3<br>TDRD3<br>PCDH20<br>IPO5<br>FARP1<br>RNF113B<br>SKT24<br>C12orf15A1<br>DOCK9<br>GPR18<br>EBI2<br>HES3ST3A1<br>TAOK1<br>ARHGAP28<br>LAMA1<br>PTPRM<br>RAB12<br>FHOD3<br>MRO<br>ME2<br>ELAC1<br>SMAD4<br>MEX3C<br>KEAP1<br>MZP1<br>MGF2752<br>LPI<br>RBM11<br>SAGS<br>SAMS1<br>ARBP1<br>USP25<br>C21orf94<br>hsa-mir-99a<br>hsa-lct-7c<br>hsa-mir-125b-2<br>CXADR<br>C21orf91<br>CHODL<br>PRSS7<br>ADAMTS1<br>ADAMTS5 | ex1                         | ACCAGCAAGGCTATGAGTCC      | AGGATCTGCTGATGAGTCC        | 191bp                  | 20706017 20706207                     |
|                      |                                                                                                                                                                                                                                                                                                                                                                                                                                                                                                                                                                                                                                                                                                                                                                                                                                                                                                                                                                                                                                                                                                                                                                            | ex3                         | GTCAATCTGAACCATGAAGC      | CAAGATTGCAATGTGAACTG       | 218bp                  | 20684383 20684600                     |
|                      |                                                                                                                                                                                                                                                                                                                                                                                                                                                                                                                                                                                                                                                                                                                                                                                                                                                                                                                                                                                                                                                                                                                                                                            | ex1                         | TTCTCAGGTTGGCCAGTACA      | AGTGGCCACAGAACTGGATT       | 150bp                  | 21019342 21019491                     |
|                      |                                                                                                                                                                                                                                                                                                                                                                                                                                                                                                                                                                                                                                                                                                                                                                                                                                                                                                                                                                                                                                                                                                                                                                            | ex1                         | TAGTATGCGACATCTTCTCGT     | CTGGAGCATCTCATAGATGG       | 284bp                  | 21067614 21067897                     |
|                      |                                                                                                                                                                                                                                                                                                                                                                                                                                                                                                                                                                                                                                                                                                                                                                                                                                                                                                                                                                                                                                                                                                                                                                            | ex1                         | TGTTGATCTGCCTCAGAACC      | TGCAGTTGCTGATGAAGTCC       | 281bp                  | 21131220 21131500                     |
|                      |                                                                                                                                                                                                                                                                                                                                                                                                                                                                                                                                                                                                                                                                                                                                                                                                                                                                                                                                                                                                                                                                                                                                                                            | ex1                         | TCCATGAGATGATCCAGCAG      | TGGAGTCCCACTTTCATCAGG      | 180bp                  | 21156194 21156373                     |
|                      |                                                                                                                                                                                                                                                                                                                                                                                                                                                                                                                                                                                                                                                                                                                                                                                                                                                                                                                                                                                                                                                                                                                                                                            | ex1                         | CTTTGATACTCTGCGCACAA      | CAGGATGGAGTCTCTCATTC       | 314bp                  | 21177108 21177421                     |
|                      |                                                                                                                                                                                                                                                                                                                                                                                                                                                                                                                                                                                                                                                                                                                                                                                                                                                                                                                                                                                                                                                                                                                                                                            | ex1                         | ATGAGGACTTCACTCTGGCT      | TGCACAGTTAAACACGATGC       | 325bp                  | 21191434 21191758                     |
|                      |                                                                                                                                                                                                                                                                                                                                                                                                                                                                                                                                                                                                                                                                                                                                                                                                                                                                                                                                                                                                                                                                                                                                                                            | ex1                         | ACCTCAGGTAGCTCACTGAT      | CATGCTTCCAGTCTGATGAG       | 400bp                  | 21191800 21192199                     |
|                      |                                                                                                                                                                                                                                                                                                                                                                                                                                                                                                                                                                                                                                                                                                                                                                                                                                                                                                                                                                                                                                                                                                                                                                            | ex1                         | CAGCAACTGAATGACCTGGA      | ACTACTGCTGTGCACAGTTAT      | 401bp                  | 21196357 21196757                     |
|                      |                                                                                                                                                                                                                                                                                                                                                                                                                                                                                                                                                                                                                                                                                                                                                                                                                                                                                                                                                                                                                                                                                                                                                                            | ex1                         | CCATGAGATGATCCAGCAGA      | CTAGGTCACTCAGTTGTCTGG      | 119bp                  | 21206947 21207065                     |
|                      |                                                                                                                                                                                                                                                                                                                                                                                                                                                                                                                                                                                                                                                                                                                                                                                                                                                                                                                                                                                                                                                                                                                                                                            | ex1                         | CCTGAAGGACAGACATGACT      | TGGAGTCTCTCATTCATCAGG      | 263bp                  | 21217755 21218017                     |
|                      |                                                                                                                                                                                                                                                                                                                                                                                                                                                                                                                                                                                                                                                                                                                                                                                                                                                                                                                                                                                                                                                                                                                                                                            | ex1                         | GACTCATCTGCTACTTGGGA      | TCACAGTCCAGGATAGAGTCC      | 148bp                  | 21294826 21294973                     |
|                      |                                                                                                                                                                                                                                                                                                                                                                                                                                                                                                                                                                                                                                                                                                                                                                                                                                                                                                                                                                                                                                                                                                                                                                            | ex1                         | TCAGATTTGAGGTTCCACAGC     | CACCGAACTGTGAGTATTGC       | 319bp                  | 21324754 21325072                     |
|                      |                                                                                                                                                                                                                                                                                                                                                                                                                                                                                                                                                                                                                                                                                                                                                                                                                                                                                                                                                                                                                                                                                                                                                                            | ex1                         | TCAGCTGCAAGTCAAGCTGC      | CTGCTGAATCACTCATGGA        | 218bp                  | 21340629 21340846                     |
|                      |                                                                                                                                                                                                                                                                                                                                                                                                                                                                                                                                                                                                                                                                                                                                                                                                                                                                                                                                                                                                                                                                                                                                                                            | ex1                         | ATGAGCTGATCCAGCAGATC      | AGTCAATTCAGCTGCTGGTAG      | 114bp                  | 21357652 21357765                     |
|                      |                                                                                                                                                                                                                                                                                                                                                                                                                                                                                                                                                                                                                                                                                                                                                                                                                                                                                                                                                                                                                                                                                                                                                                            | ex1                         | CAGTCTAGCAGCATCTGCAA      | ATCTGTGCCAGGAGCATCAA       | 159bp                  | 21375198 21375356                     |
|                      |                                                                                                                                                                                                                                                                                                                                                                                                                                                                                                                                                                                                                                                                                                                                                                                                                                                                                                                                                                                                                                                                                                                                                                            | ex1                         | TGATCTGCCTCAGACTCACA      | AGCTGCTGGTCAAGTTTCGAT      | 276bp                  | 21399247 21399522                     |
|                      |                                                                                                                                                                                                                                                                                                                                                                                                                                                                                                                                                                                                                                                                                                                                                                                                                                                                                                                                                                                                                                                                                                                                                                            | ex1                         | AGAGTCAACCATCTCAGCAA      | ATCTGCTGGATCAGCTCATG       | 274bp                  | 21430493 21430766                     |
|                      |                                                                                                                                                                                                                                                                                                                                                                                                                                                                                                                                                                                                                                                                                                                                                                                                                                                                                                                                                                                                                                                                                                                                                                            | ex1                         | TCCATGAGATGCTTTCAGCAG     | TAAGCTCTTGTCTCATGTGC       | 360bp                  | 21471093 21471452                     |
|                      |                                                                                                                                                                                                                                                                                                                                                                                                                                                                                                                                                                                                                                                                                                                                                                                                                                                                                                                                                                                                                                                                                                                                                                            | ex1                         | GCTGGCATAGCTGTTGAAC       | ATACACGAAGGACTGGCATG       | 101bp                  | 21502068 21502168                     |
|                      |                                                                                                                                                                                                                                                                                                                                                                                                                                                                                                                                                                                                                                                                                                                                                                                                                                                                                                                                                                                                                                                                                                                                                                            | ex1                         | TACCATACCTCAGATAGGG       | GAGTCTACAGACATGCCTGA       | 97bp                   | 21849369 21849465                     |
|                      |                                                                                                                                                                                                                                                                                                                                                                                                                                                                                                                                                                                                                                                                                                                                                                                                                                                                                                                                                                                                                                                                                                                                                                            | ex2                         | ACAAGCTTCTTTCCGTCATGCCG   | TGAGCTTTGGAAGCTCTCAG       | 421bp                  | 21960851 21961271                     |
|                      |                                                                                                                                                                                                                                                                                                                                                                                                                                                                                                                                                                                                                                                                                                                                                                                                                                                                                                                                                                                                                                                                                                                                                                            | ex1b                        | TCAGTAGCATCAGCAGAGG       | TGCTCACTCTGGTGCCAAAG       | 217bp                  | 21984180 21984396                     |
|                      |                                                                                                                                                                                                                                                                                                                                                                                                                                                                                                                                                                                                                                                                                                                                                                                                                                                                                                                                                                                                                                                                                                                                                                            | ex2                         | TCTTTAAATGGCTCCACCTGCCTT  | TCGCCGTGGCAGCCTTCATCGAATTA | 442bp                  | 21995894 21996335                     |
|                      |                                                                                                                                                                                                                                                                                                                                                                                                                                                                                                                                                                                                                                                                                                                                                                                                                                                                                                                                                                                                                                                                                                                                                                            | ex2                         | CCTAGAGTAGGTATCAGTCC      | TCCTGAAGTACAGTCTGCCAC      | 207bp                  | 22441683 22441889                     |
|                      |                                                                                                                                                                                                                                                                                                                                                                                                                                                                                                                                                                                                                                                                                                                                                                                                                                                                                                                                                                                                                                                                                                                                                                            | ex2                         | CCATGTACTGACCCTTTGTAG     | CCATAAGCCATATTGAGCAG       | 252bp                  | 23683455 23683706                     |
|                      |                                                                                                                                                                                                                                                                                                                                                                                                                                                                                                                                                                                                                                                                                                                                                                                                                                                                                                                                                                                                                                                                                                                                                                            | ex2                         | GCTTTGTCTCAGAACCGATC      | TATCTCTCAGCTGAGTTGTGC      | 163bp                  | 25668607 25668769                     |
|                      |                                                                                                                                                                                                                                                                                                                                                                                                                                                                                                                                                                                                                                                                                                                                                                                                                                                                                                                                                                                                                                                                                                                                                                            | ex2                         | TGGACCTGACTGTGTCAATTG     | ACATCAGGAAGCATCTTCTG       | 118bp                  | 26877318 26877435                     |
|                      |                                                                                                                                                                                                                                                                                                                                                                                                                                                                                                                                                                                                                                                                                                                                                                                                                                                                                                                                                                                                                                                                                                                                                                            | ex2                         | ATGTCTTAGGCTAAGTCAAG      | AAGTGGCAATTGGAAGTGTCCA     | 224bp                  | 26925039 26925262                     |
|                      |                                                                                                                                                                                                                                                                                                                                                                                                                                                                                                                                                                                                                                                                                                                                                                                                                                                                                                                                                                                                                                                                                                                                                                            | ex2                         | AGCCTTGTAGTGGTACACAG      | GCAAGTGGCCACTGGAATATT      | 271bp                  | 26951814 26952084                     |
|                      |                                                                                                                                                                                                                                                                                                                                                                                                                                                                                                                                                                                                                                                                                                                                                                                                                                                                                                                                                                                                                                                                                                                                                                            | ex2                         | GCAACATGAAAGTTCACAGGC     | GTAGGTCCAGATTTCCTTTGC      | 192bp                  | 26989506 26989697                     |
|                      |                                                                                                                                                                                                                                                                                                                                                                                                                                                                                                                                                                                                                                                                                                                                                                                                                                                                                                                                                                                                                                                                                                                                                                            | ex2                         | CGAACCATGAAGATGCGTCA      | ACATTCAGGTAGTGCATGCC       | 131bp                  | 27148116 27148246                     |
|                      |                                                                                                                                                                                                                                                                                                                                                                                                                                                                                                                                                                                                                                                                                                                                                                                                                                                                                                                                                                                                                                                                                                                                                                            | ex2                         | CATTGGCTTAATGTGTACCT      | GACACTTAAGTGAACCAGG        | 192bp                  | 27286545 27286736                     |
|                      |                                                                                                                                                                                                                                                                                                                                                                                                                                                                                                                                                                                                                                                                                                                                                                                                                                                                                                                                                                                                                                                                                                                                                                            | ex2                         | AGCTACAGGCTGTAAAGCTG      | CACAGATGGTGCCATAGATG       | 366bp                  | 27445311 27445676                     |
|                      |                                                                                                                                                                                                                                                                                                                                                                                                                                                                                                                                                                                                                                                                                                                                                                                                                                                                                                                                                                                                                                                                                                                                                                            | ex2                         | TTGTCAGCCACTACCTAGAGA     | ATGCTGTTTCAAGTTGGACAGC     | 251bp                  | 27515885 27516136                     |
|                      |                                                                                                                                                                                                                                                                                                                                                                                                                                                                                                                                                                                                                                                                                                                                                                                                                                                                                                                                                                                                                                                                                                                                                                            | ex2                         | GAACTGCACTGATGTGCTGC      | GCTCAATCACTGAGAAGTACC      | 182bp                  | 27556947 27557128                     |
|                      |                                                                                                                                                                                                                                                                                                                                                                                                                                                                                                                                                                                                                                                                                                                                                                                                                                                                                                                                                                                                                                                                                                                                                                            | ex2                         | AGTACCTCGGAAGTCCCAGA      | TGCAGGCAGCTCATGATACA       | 245bp                  | 28660234 28660478                     |
|                      |                                                                                                                                                                                                                                                                                                                                                                                                                                                                                                                                                                                                                                                                                                                                                                                                                                                                                                                                                                                                                                                                                                                                                                            | ex2                         | TAAAGTTGCATAATCGCTGGC     | TGCCAACTCTTTTGTAGTCT       | 230bp                  | 80105157 80105386                     |
|                      |                                                                                                                                                                                                                                                                                                                                                                                                                                                                                                                                                                                                                                                                                                                                                                                                                                                                                                                                                                                                                                                                                                                                                                            | ex2                         | GATGCGAGCGGATTATGTCA      | AACTTCAAATGCACCTGGCAG      | 145bp                  | 81379650 81379794                     |
| ex3                  | GCAGATGATTGGAAGCTCCA                                                                                                                                                                                                                                                                                                                                                                                                                                                                                                                                                                                                                                                                                                                                                                                                                                                                                                                                                                                                                                                                                                                                                       | ATCGATGAAGTGTGCTGAGTGG      | 300bp                     | 121051111 121051410        |                        |                                       |
| ex2                  | AGGAAGCGCCATATTGATCC                                                                                                                                                                                                                                                                                                                                                                                                                                                                                                                                                                                                                                                                                                                                                                                                                                                                                                                                                                                                                                                                                                                                                       | ATGGGCAGGAAGTTATCACG        | 365bp                     | 35025424 35143757          |                        |                                       |
| ex5                  | TCACGGGACACCAAGAAGTCA                                                                                                                                                                                                                                                                                                                                                                                                                                                                                                                                                                                                                                                                                                                                                                                                                                                                                                                                                                                                                                                                                                                                                      | ATTGGCCTCCAGGTACTGAT        | 265bp                     | 34677082 34798977          |                        |                                       |
| ex2                  | TAGCTTCCAGATCAACAAGAGC                                                                                                                                                                                                                                                                                                                                                                                                                                                                                                                                                                                                                                                                                                                                                                                                                                                                                                                                                                                                                                                                                                                                                     | CACCTGGAATCAGTTTGAGTG       | 231bp                     | 23682047 23682277          |                        |                                       |
| ex4                  | CTTACCTFACCTAAGAGGTGC                                                                                                                                                                                                                                                                                                                                                                                                                                                                                                                                                                                                                                                                                                                                                                                                                                                                                                                                                                                                                                                                                                                                                      | GTAGGCAGACATAGGCTTCT        | 122bp                     | 25741132 25741253          |                        |                                       |
| ex3                  | TTAACAGAAAATCTGTCTCAGA                                                                                                                                                                                                                                                                                                                                                                                                                                                                                                                                                                                                                                                                                                                                                                                                                                                                                                                                                                                                                                                                                                                                                     | TTTCAGCCAAATTAAAGTTCTACCACA | 182bp                     | 83639869 83640050          |                        |                                       |
| ex1                  | AACTCGCAAAAGCAACCTGA                                                                                                                                                                                                                                                                                                                                                                                                                                                                                                                                                                                                                                                                                                                                                                                                                                                                                                                                                                                                                                                                                                                                                       | GTCACCTCTTCTCAGGCTAG        | 371bp                     | 15265144 15265514          |                        |                                       |
| ex2                  | ATGTGCTGACCATTTCAGCG                                                                                                                                                                                                                                                                                                                                                                                                                                                                                                                                                                                                                                                                                                                                                                                                                                                                                                                                                                                                                                                                                                                                                       | TGAGACGGCTATGAACTGAT        | 104bp                     | 15593317 15593420          |                        |                                       |
| ex2                  | TGGCTACGGATTCATCACCTA                                                                                                                                                                                                                                                                                                                                                                                                                                                                                                                                                                                                                                                                                                                                                                                                                                                                                                                                                                                                                                                                                                                                                      | AGCAAGCAGAGTTTCATGGCT       | 262bp                     | 15725242 15725503          |                        |                                       |
| ex2                  | CACCTGAATAAGGATGCCACC                                                                                                                                                                                                                                                                                                                                                                                                                                                                                                                                                                                                                                                                                                                                                                                                                                                                                                                                                                                                                                                                                                                                                      | TGTATGGCAGCCAGTGAAGTC       | 165bp                     | 15927826 15927990          |                        |                                       |
| ex2                  | AAGTGAATCACCCGGCAGTT                                                                                                                                                                                                                                                                                                                                                                                                                                                                                                                                                                                                                                                                                                                                                                                                                                                                                                                                                                                                                                                                                                                                                       | AGTCATGGACAGCTGCAATC        | 199bp                     | 16001161 16001359          |                        |                                       |
| ex2                  | TTGACCTCACCCAGGTAAATG                                                                                                                                                                                                                                                                                                                                                                                                                                                                                                                                                                                                                                                                                                                                                                                                                                                                                                                                                                                                                                                                                                                                                      | GCCAAACGATGGGCATACTTC       | 264bp                     | 16398458 16398721          |                        |                                       |
| ex2                  | TACTGGCATGAAGACTGCGCT                                                                                                                                                                                                                                                                                                                                                                                                                                                                                                                                                                                                                                                                                                                                                                                                                                                                                                                                                                                                                                                                                                                                                      | CATCCAGTTCATCACTGGTGT       | 150bp                     | 16644819 16644968          |                        |                                       |
| ex2                  | CATGCTACCAATAGGGGTAC                                                                                                                                                                                                                                                                                                                                                                                                                                                                                                                                                                                                                                                                                                                                                                                                                                                                                                                                                                                                                                                                                                                                                       | CAGTCTGGCTTCAAGGTACT        | 199bp                     | 18133508 18133706          |                        |                                       |
| ex2                  | TTCTAGCCAAGTCAAGCTCG                                                                                                                                                                                                                                                                                                                                                                                                                                                                                                                                                                                                                                                                                                                                                                                                                                                                                                                                                                                                                                                                                                                                                       | CTTGATGCCAGGAGAGTTCA        | 206bp                     | 18326378 18326583          |                        |                                       |
| ex2                  | AGTGCAGGTACCAACATCTTG                                                                                                                                                                                                                                                                                                                                                                                                                                                                                                                                                                                                                                                                                                                                                                                                                                                                                                                                                                                                                                                                                                                                                      | TTTCATGACCTGTAGAGCCGT       | 240bp                     | 18781576 18781815          |                        |                                       |
| ex1                  | ATGACACTTAGCGTGTGAG                                                                                                                                                                                                                                                                                                                                                                                                                                                                                                                                                                                                                                                                                                                                                                                                                                                                                                                                                                                                                                                                                                                                                        | CATCGATGCAGAGTGGTACA        | 199bp                     | 18782470 18782668          |                        |                                       |
| ex2                  | GTGCGAGAACATAGTTCTCTC                                                                                                                                                                                                                                                                                                                                                                                                                                                                                                                                                                                                                                                                                                                                                                                                                                                                                                                                                                                                                                                                                                                                                      | GCTGAGGAGTAATCACAGCA        | 392bp                     | 19176322 19176713          |                        |                                       |
| ex2                  | GACAGCACAATTTCCAGTGG                                                                                                                                                                                                                                                                                                                                                                                                                                                                                                                                                                                                                                                                                                                                                                                                                                                                                                                                                                                                                                                                                                                                                       | GCTAGAGTTGAAGCAAGCCT        | 129bp                     | 19506736 19506864          |                        |                                       |
| ex2                  | GGTAGCCATTGGTGACAAGCA                                                                                                                                                                                                                                                                                                                                                                                                                                                                                                                                                                                                                                                                                                                                                                                                                                                                                                                                                                                                                                                                                                                                                      | ACAAGTCTCTTGCCTCAGCA        | 148bp                     | 2                          |                        |                                       |
