# Supplementary material
Source: PubMed Central journal article supplement (PMC2921682)
Supplement: NIHMS202177-supplement-Kohno_Suppl_Table_3.pdf [file NIHMS202177-supplement-Kohno_Suppl_Table_3.pdf]

**Supplementary Table 3. 64 genes homozygously deleted in two or more lung cancer cell lin**

| Chr location | Gene                     | No. of cases with HD | ( % )  |
|--------------|--------------------------|----------------------|--------|
| 9p21         | CDKN2A/p16, p14ARF       | 20                   | ( 27 ) |
| 9p21         | CDKN2B/p15               | 19                   | ( 25 ) |
| 9p21         | hsa-mir31*               | 10                   | ( 13 ) |
| 9p21         | IFNA8                    | 10                   | ( 13 ) |
| 9p21         | IFNE1                    | 10                   | ( 13 ) |
| 9p21         | DMRTA1                   | 9                    | ( 12 ) |
| 9p21         | IFNA1,2,13               | 9                    | ( 12 ) |
| 9p21         | ELAVL2                   | 8                    | ( 11 ) |
| 9p21         | IFNA6, 7, 14             | 8                    | ( 11 ) |
| 9p21         | KLHL9                    | 8                    | ( 11 ) |
| 9p21         | MTAP                     | 8                    | ( 11 ) |
| 9p23         | PTPRD                    | 8                    | ( 11 ) |
| 2q22         | LRP1B/LRP-DIP            | 7                    | ( 9 )  |
| 9p21         | IFNW1                    | 7                    | ( 9 )  |
| 9p21         | IFNA4, 5, 10, 16, 17, 21 | 6                    | ( 8 )  |
| 9p21         | IFNB1                    | 6                    | ( 8 )  |
| 9p21         | PTPLAD2                  | 6                    | ( 8 )  |
| 3p14         | FHIT                     | 4                    | ( 5 )  |
| 9p21         | TUSC1                    | 4                    | ( 5 )  |
| 9p21         | hsa-mir491*              | 3                    | ( 4 )  |
| 9p21         | KIAA1797                 | 3                    | ( 4 )  |
| 9p21         | MLLT3                    | 3                    | ( 4 )  |
| 2q24         | COBLL1                   | 2                    | ( 3 )  |
| 2q24         | FAM130A2                 | 2                    | ( 3 )  |
| 2q24         | FLJ39822                 | 2                    | ( 3 )  |
| 2q24         | GALNT3                   | 2                    | ( 3 )  |
| 2q24         | GRB14                    | 2                    | ( 3 )  |
| 2q24         | SCN2A                    | 2                    | ( 3 )  |
| 2q24         | SCN3A                    | 2                    | ( 3 )  |
| 5q11         | PDE4D                    | 2                    | ( 3 )  |
| 5q31         | CTNNA1                   | 2                    | ( 3 )  |
| 7q35         | CNTNAP2                  | 2                    | ( 3 )  |
| 9p21         | LINGO2                   | 2                    | ( 3 )  |
| 10p11        | PARD3                    | 2                    | ( 3 )  |
| 18q21        | ELAC1                    | 2                    | ( 3 )  |
| 18q21        | ME2                      | 2                    | ( 3 )  |
| 19p13        | KEAP1                    | 2                    | ( 3 )  |
| 19q13        | MGC2752                  | 2                    | ( 3 )  |
| 19q13        | MZF1                     | 2                    | ( 3 )  |
| 21q11        | BTG3/ANA                 | 2                    | ( 3 )  |
| 21q11        | C21orf34                 | 2                    | ( 3 )  |
| 21q11        | C21orf91                 | 2                    | ( 3 )  |
| 21q11        | CHODL                    | 2                    | ( 3 )  |
| 21q11        | CXADR                    | 2                    | ( 3 )  |
| 21q11        | hsa-let-7c*              | 2                    | ( 3 )  |
| 21q11        | hsa-mir-125b-2*          | 2                    | ( 3 )  |
| 21q11        | hsa-mir-99a*             | 2                    | ( 3 )  |
| 21q11        | LIPI                     | 2                    | ( 3 )  |
| 21q11        | NRIP1                    | 2                    | ( 3 )  |
| 21q11        | PRSS7                    | 2                    | ( 3 )  |
| 21q11        | RBM11                    | 2                    | ( 3 )  |
| 21q11        | SAMSN1                   | 2                    | ( 3 )  |
| 21q11        | STCH                     | 2                    | ( 3 )  |
| 21q11        | USP25                    | 2                    | ( 3 )  |

---

\*microRNA genes.
