# Supplementary material
Source: PubMed Central journal article supplement (PMC2921682)
Supplement: NIHMS202177-supplement-Kohno_Suppl_Table_4.pdf [file NIHMS202177-supplement-Kohno_Suppl_Table_4.pdf]

**Supplementary Table 4. Number of homozygously deleted genes in lung cancer cell lines according to genetic alterations**

| Gene                         | Genetic alteration | No. of cell line | No. of genes homozygously deleted |   |      | P by t-test         |                       |
|------------------------------|--------------------|------------------|-----------------------------------|---|------|---------------------|-----------------------|
|                              |                    |                  | Mean                              | ± | SD   | univariate analysis | multivariate analysis |
| <b>Oncogene</b>              |                    |                  |                                   |   |      |                     |                       |
| <i>EGFR</i>                  | +                  | 4                | 14.5                              | ± | 9.1  | 0.14                | -                     |
|                              | -                  | 69               | 5.5                               | ± | 11.9 |                     |                       |
| <i>KRAS</i>                  | +                  | 12               | 3.3                               | ± | 3.6  | 0.10                | -                     |
|                              | -                  | 61               | 6.5                               | ± | 12.8 |                     |                       |
| <i>NRAS</i>                  | +                  | 4                | 6.0                               | ± | 9.4  | 1.00                | -                     |
|                              | -                  | 69               | 6.0                               | ± | 12.1 |                     |                       |
| <i>PI3KCA</i>                | +                  | 7                | 8.3                               | ± | 12.0 | 0.62                | -                     |
|                              | -                  | 66               | 5.8                               | ± | 11.9 |                     |                       |
| <b>Tumor suppressor gene</b> |                    |                  |                                   |   |      |                     |                       |
| <i>TP53</i>                  | +                  | 65               | 6.5                               | ± | 12.5 | 0.027               | 0.42                  |
|                              | -                  | 9                | 2.0                               | ± | 3.6  |                     |                       |
| <i>CDKN2A/p16</i>            | +                  | 42               | 9.7                               | ± | 14.5 | 0.00041             | 0.018                 |
|                              | -                  | 31               | 1.0                               | ± | 2.5  |                     |                       |
| <i>LKB1</i>                  | +                  | 21               | 9.6                               | ± | 12.3 | 0.068               | 0.29                  |
|                              | -                  | 53               | 3.7                               | ± | 6.4  |                     |                       |
| <i>PTEN</i>                  | +                  | 8                | 0.6                               | ± | 1.2  | 0.00033             | 0.62                  |
|                              | -                  | 66               | 6.6                               | ± | 12.4 |                     |                       |
